# Supplementary material for: Breast Milk Supply of MicroRNA Associated with Leptin and Adiponectin Is Affected by Maternal Overweight/Obesity and Influences Infancy BMI
Source: PubMed Central journal article supplement (PMC6893542; doi:10.3390/nu11112589), 2019-10-28
Supplement: nutrients-11-02589-s001.pdf [file nutrients-11-02589-s001.pdf]

# Breast milk supply of microRNA associated with leptin and adiponectin is affected by maternal overweight/obesity and influences infancy BMI

Rocío Zamanillo<sup>1,4</sup>, Juana Sánchez<sup>1,2,3,5</sup>, Francisca Serra<sup>1,2,3,6\*</sup> and Andreu Palou<sup>1,2,3,7</sup>

<sup>1</sup> Laboratory of Molecular Biology, Nutrition and Biotechnology (Group of Nutrigenomics and Obesity), University of the Balearic Islands 07122 Palma, Spain

<sup>2</sup> CIBER de Fisiopatología de la Obesidad y Nutrición (CIBERObn), Instituto de Salud Carlos III (ISCIII), Madrid, Spain

<sup>3</sup> Instituto de Investigación Sanitaria Illes Balears (IdISBa).

\* Correspondence: [francisca.serra@uib.es](mailto:francisca.serra@uib.es). Tel.: +34 971173051

Table S1. miRNA selected to assay in breast milk from lactating mothers.

| miRNA           | Mature sequence         | Reference assay <sup>1</sup> | Main criteria for selection                                          |
|-----------------|-------------------------|------------------------------|----------------------------------------------------------------------|
| hsa-let-7a-5p   | UGAGGUAGUAGGUUGUAUAGUU  | 000377                       | Target of ADIPOR2, LEPR<br>Found in human breast milk                |
| hsa-let-7b-5p   | UGAGGUAGUAGGUUGUGUGGUU  | 000378                       | Target of ADIPOQ, ADIPOR2,<br>LEPR<br>Found in human breast milk     |
| hsa-let-7c-5p   | UGAGGUAGUAGGUUGUAUGGUU  | 000379                       | Target of ADIPOQ, ADIPOR2,<br>LEPR                                   |
| hsa-miR-103a-3p | AGCAGCAUUGUACAGGGCUAUGA | 000439                       | Found in human breast milk                                           |
| hsa-miR-122a    | UGGAGUGUGACAAUGGUGUUUGU | 000445*                      | Liver-specific and found in<br>cow milk                              |
| hsa-miR-126-3p  | UCGUACCGUGAGUAAUAAUGCG  | 002228*                      | Involved in obesity                                                  |
| hsa-miR-143-3p  | UGAGAUGAAGCACUGUAGCUCA  | 000466†                      | Target of ADIPOQ<br>Involved in obesity                              |
| hsa-miR-145-5p  | GUCCAGUUUCCAGGAAUCCCU   | 002278*                      | Involved in obesity                                                  |
| hsa-miR-146b-5p | UGAGAACUGAAUCCAUAGGCU   | 001097                       | Target of LEP<br>Found in human breast milk                          |
| hsa-miR-148a-3p | UCAGUGCACUACAGAACUUUGU  | 000470                       | Highly abundant in human<br>breast milk                              |
| hsa-miR-150-5p  | UCUCCCAACCCUUGUACCAGUG  | 000473*                      | Target of LEPR, ADIPOR2                                              |
| hsa-miR-153-3p  | UUGCAUAGUCACAAAAGUGAUC  | 001191*                      | Target of ADIPOQ                                                     |
| hsa-miR-17-5p   | CAAAGUGCUUACAGUGCAGGUAG | 002308                       | Target of LEP, ADIPOR2<br>Found in plasma and<br>involved in obesity |

|                 |                                                                                                                        |         |                                                                           |
|-----------------|------------------------------------------------------------------------------------------------------------------------|---------|---------------------------------------------------------------------------|
| hsa-miR-181a-5p | AACAUUCAACGCUGUCGGUGAGU                                                                                                | 000480  | Target of ADIPOQ, LEPR<br>Found in breast milk and<br>involved in obesity |
| hsa-miR-200b-3p | UAAUACUGCCUGGUAUUGAUGA                                                                                                 | 002251  | Target of ADIPOQ, ADIPOR2,<br>LEPR                                        |
| hsa-miR-221-3p  | AGCUACAUUGUCUGCUGGGUUUC                                                                                                | 000524* | Target of ADIPOR1<br>Found in plasma and<br>involved in obesity           |
| hsa-miR-222-3p  | AGCUACAUCUGGCUACUGGGU                                                                                                  | 002276  | Target of ADIPOR1<br>Found in plasma and<br>involved in obesity           |
| hsa-miR-26a-5p  | UUCAAGUAAUCCAGGAUAGGCU                                                                                                 | 000405* | Target of ADIPOR1<br>Found in human breast milk                           |
| hsa-miR-26b-5p  | UUCAAGUAAUUCAGGAUAGGU                                                                                                  | 000407† | Target of ADIPOR1                                                         |
| hsa-miR-27a-3p  | UUCACAGUGGCUAAGUCCGC                                                                                                   | 000408  | Target of LEP, ADIPOQ<br>Involved in obesity                              |
| hsa-miR-27b-3p  | UUCACAGUGGCUAAGUUCUGC                                                                                                  | 000409  | Target of LEP, ADIPOQ                                                     |
| hsa-miR-30a-5p  | UGUAAACAUCCUCGACUGGAAG                                                                                                 | 000417  | Target of LEP, LEPR                                                       |
| hsa-miR-384     | AUUCCUAGAAUUGUUCAUA                                                                                                    | 000574* | Target of LEPR<br>Associated with<br>adipogenesis                         |
| hsa-miR-451     | AAACCGUUACCAUACUGAGUUU                                                                                                 | 001105* | Target of ADIPOQ                                                          |
| hsa-miR-539-5p  | GGAGAAAUUAUCCUUGGUGUGU                                                                                                 | 001286* | Expressed in human HEK-239<br>cells                                       |
| hsa-miR-95-3p   | UUCAACGGGUUUUAUUGAGCA                                                                                                  | 000433* | Expressed in adipose tissue                                               |
| U6 snRNA        | GTGCTCGCTTCGGCAGCACATATACT<br>AAAATTGGAACGATACAGAGAAGATT<br>AGCATGGCCCCTGCGCAAGGATGACAC<br>GCAAATTCGTGAAGCGTTCCATATTTT | 001973  | Control                                                                   |

1: Data obtained from [www.thermofisher.com](http://www.thermofisher.com), accessed on 07/03/2016

\* miRNA were undetected or undetermined in the milk samples.

† Data showed very high variability between samples or low efficiency at amplification and were not considered for analysis.

Selection of miRNA was based on their role as targets for mRNA of leptin (LEP), adiponectin (ADIPOQ) or their respective receptors (LEPR, ADIPOR1 and ADIPOR2), described in fluids (plasma or milk) or associated with obesity. U6 snRNA was selected as the endogenous control in the comparative cycle threshold method.

Table S2. Participant characteristics

|           |                                | Whole population<br>(n=59) | Normal-weight<br>(n=38) | Overweight/<br>obese<br>(n=21) |      |
|-----------|--------------------------------|----------------------------|-------------------------|--------------------------------|------|
| Sex       | Boy/Girl                       | 28/31                      | 16/22                   | 12/9                           |      |
| Location  | Capital/ Neighborhood/<br>Town | 21/13/25                   | 12/9/17                 | 9/4/8                          |      |
| Ethnicity | Caucasian/Other                | 53/6                       | 35/3                    | 18/3                           |      |
| Delivery  | Natural/Caesarean              | 49/10                      | 35/3                    | 14/7                           |      |
|           | Winter/Summer                  | 38/21                      | 25/13                   | 13/8                           |      |
|           | Term/Pre-term/Post-term        | 51/5/3                     | 35/2/1                  | 16/3/2                         |      |
| Lactation | Breastfeeding/mixed            | Month 1                    | 51/8                    | 36/2                           | 15/6 |
|           |                                | Month 2                    | 50/9                    | 34/4                           | 16/5 |
|           |                                | Month 3                    | 46/13                   | 32/6                           | 14/7 |

Characteristics of the cohort of lactating mothers recruited for participating in the present study. The whole population was segregated in normal-weight mothers (BMI<25) and overweight or obese (BMI≥25).

Table S3. Maternal data and infant anthropometry

|                          |          | Whole population |       |       |       |      | Normal-weight |       |       |       |      | Overweight/Obese |       |       |       |      |
|--------------------------|----------|------------------|-------|-------|-------|------|---------------|-------|-------|-------|------|------------------|-------|-------|-------|------|
|                          |          | N                | Min   | Max   | Mean  | SD   | N             | Min   | Max   | Mean  | SD   | N                | Min   | Max   | Mean  | SD   |
| <b>Mother</b>            |          |                  |       |       |       |      |               |       |       |       |      |                  |       |       |       |      |
| Age                      |          | 59               | 25.0  | 42.0  | 32.0  | 3.48 | 38            | 25.0  | 42.0  | 32.2  | 3.42 | 21               | 25.0  | 41.0  | 31.6  | 3.65 |
| BMI (kg/m <sup>2</sup> ) |          | 59               | 17.46 | 38.30 | 24.07 | 4.44 | 38            | 17.46 | 24.57 | 21.43 | 1.85 | 21               | 25.1  | 38.30 | 28.87 | 3.66 |
| Gestational age (weeks)  |          | 59               | 34.0  | 42.0  | 39.1  | 1.73 | 38            | 34.0  | 42.0  | 39.2  | 1.56 | 21               | 34.0  | 42.0  | 38.8  | 2.02 |
| <b>Infant</b>            |          |                  |       |       |       |      |               |       |       |       |      |                  |       |       |       |      |
| Body weight (kg)         | at birth | 59               | 1.87  | 4.17  | 3.19  | 0.52 | 38            | 2.06  | 4.17  | 3.23  | 0.44 | 21               | 1.87  | 4.06  | 3.11  | 0.64 |
|                          | Month 1  | 59               | 2.60  | 5.86  | 4.00  | 0.71 | 38            | 3.00  | 5.86  | 3.94  | 0.68 | 21               | 2.60  | 5.55  | 4.11  | 0.78 |
|                          | Month 2  | 59               | 3.50  | 7.12  | 5.04  | 0.82 | 38            | 3.50  | 7.12  | 4.98  | 0.81 | 21               | 3.74  | 6.88  | 5.14  | 0.86 |
|                          | Month 3  | 59               | 4.08  | 8.01  | 5.88  | 0.84 | 38            | 4.55  | 8.01  | 5.80  | 0.77 | 21               | 4.08  | 7.69  | 6.03  | 0.96 |
|                          | Month 6  | 59               | 5.89  | 9.85  | 7.51  | 0.91 | 38            | 5.89  | 9.85  | 7.44  | 0.86 | 21               | 5.91  | 9.49  | 7.66  | 1.00 |
|                          | Month 12 | 59               | 6.98  | 12.47 | 9.42  | 1.15 | 38            | 6.98  | 12.39 | 9.31  | 1.05 | 21               | 7.47  | 12.47 | 9.63  | 1.32 |
|                          | Month 18 | 59               | 8.24  | 14.60 | 10.86 | 1.23 | 38            | 8.24  | 14.60 | 10.71 | 1.18 | 21               | 9.30  | 13.89 | 11.13 | 1.28 |
|                          | Month 24 | 54               | 9.50  | 16.70 | 12.35 | 1.45 | 35            | 9.50  | 16.70 | 12.24 | 1.42 | 19               | 10.38 | 15.32 | 12.55 | 1.53 |
| Length (cm)              | at birth | 58               | 43.00 | 53.00 | 49.30 | 2.15 | 37            | 46.00 | 53.00 | 49.30 | 1.71 | 21               | 43.00 | 53.00 | 49.31 | 2.80 |
|                          | Month 1  | 59               | 46.50 | 58.50 | 52.99 | 2.90 | 38            | 46.50 | 58.00 | 52.83 | 2.68 | 21               | 46.50 | 58.50 | 53.26 | 3.31 |
|                          | Month 2  | 59               | 51.00 | 63.00 | 56.53 | 2.93 | 38            | 51.00 | 63.00 | 56.43 | 2.85 | 21               | 51.00 | 62.00 | 56.71 | 3.14 |
|                          | Month 3  | 59               | 53.00 | 66.50 | 59.87 | 3.06 | 38            | 53.00 | 66.50 | 59.76 | 2.97 | 21               | 53.00 | 64.50 | 60.07 | 3.30 |
|                          | Month 6  | 59               | 60.00 | 73.00 | 66.75 | 2.74 | 38            | 61.50 | 73.00 | 66.68 | 2.75 | 21               | 60.00 | 71.50 | 66.88 | 2.78 |
|                          | Month 12 | 59               | 68.00 | 82.00 | 75.19 | 2.97 | 38            | 68.00 | 82.00 | 75.09 | 2.95 | 21               | 70.00 | 81.00 | 75.38 | 3.07 |
|                          | Month 18 | 59               | 75.50 | 89.00 | 81.83 | 3.00 | 38            | 75.50 | 87.50 | 81.49 | 2.79 | 21               | 76.00 | 89.00 | 82.45 | 3.34 |
|                          | Month 24 | 54               | 79.00 | 95.00 | 87.64 | 3.11 | 35            | 79.00 | 94.00 | 87.44 | 3.13 | 19               | 81.50 | 95.00 | 88.03 | 3.12 |
| BMI (kg/m <sup>2</sup> ) | BMI1     | 59               | 11.04 | 17.42 | 14.14 | 1.42 | 38            | 11.04 | 17.42 | 14.03 | 1.44 | 21               | 11.88 | 16.74 | 14.33 | 1.39 |
|                          | BMI2     | 59               | 12.76 | 20.11 | 15.69 | 1.53 | 38            | 12.76 | 20.11 | 15.57 | 1.57 | 21               | 13.82 | 19.10 | 15.89 | 1.47 |

|       |    |       |       |       |      |    |       |       |       |      |    |       |       |       |      |
|-------|----|-------|-------|-------|------|----|-------|-------|-------|------|----|-------|-------|-------|------|
| BMI3  | 59 | 13.30 | 19.77 | 16.35 | 1.37 | 38 | 13.30 | 19.77 | 16.20 | 1.30 | 21 | 14.33 | 19.35 | 16.61 | 1.49 |
| BMI6  | 59 | 14.37 | 19.75 | 16.82 | 1.33 | 38 | 14.84 | 19.75 | 16.69 | 1.24 | 21 | 14.37 | 19.56 | 17.06 | 1.49 |
| BMI12 | 59 | 14.48 | 19.98 | 16.63 | 1.34 | 38 | 14.48 | 19.27 | 16.48 | 1.19 | 21 | 14.68 | 19.98 | 16.89 | 1.56 |
| BMI18 | 59 | 13.63 | 19.07 | 16.18 | 1.13 | 38 | 13.63 | 19.07 | 16.10 | 1.16 | 21 | 14.14 | 18.78 | 16.33 | 1.07 |
| BMI24 | 54 | 13.87 | 19.76 | 16.04 | 1.29 | 35 | 13.87 | 18.90 | 15.97 | 1.25 | 19 | 14.09 | 19.76 | 16.16 | 1.40 |

Whole population was segregated in normal-weight mothers (BMI<25) and overweight or obese (BMI≥25) at sampling time. Infant data was recorded from birth up to 2 years old.

Analysis of variance (ANOVA) was used to assess the impact of maternal obesity on the data collected. No statistical significant differences ( $p<0.05$ ) were found.

Table S4. Correlations between miRNA during lactation and fatty acid content in milk.

|           |   | Normal-weight |        |       |       |         |        |       |      |         |       |       |        | Overweight/obese |       |       |      |         |       |        |      |         |      |       |      |     |      |      |    |
|-----------|---|---------------|--------|-------|-------|---------|--------|-------|------|---------|-------|-------|--------|------------------|-------|-------|------|---------|-------|--------|------|---------|------|-------|------|-----|------|------|----|
|           |   | Month 1       |        |       |       | Month 2 |        |       |      | Month 3 |       |       |        | Month 1          |       |       |      | Month 2 |       |        |      | Month 3 |      |       |      |     |      |      |    |
|           |   | SFA           | MUFA   | PUFA  | TG    | SFA     | MUFA   | PUFA  | TG   | SFA     | MUFA  | PUFA  | TG     | SFA              | MUFA  | PUFA  | TG   | SFA     | MUFA  | PUFA   | TG   | SFA     | MUFA | PUFA  | TG   | SFA | MUFA | PUFA | TG |
| miR-148a  | r | -.088         | -.272  | .264  | .156  | .096    | -.029  | -.045 | .233 | .147    | .245  | -.002 | .367*  | .119             | .135  | -.214 | .185 | .077    | .286  | -.269  | .153 | .293    | .077 | .182  | .046 |     |      |      |    |
|           | p | .619          | .119   | .131  | .377  | .580    | .865   | .796  | .172 | .393    | .151  | .993  | .028   | .639             | .593  | .395  | .463 | .768    | .266  | .297   | .557 | .223    | .753 | .455  | .853 |     |      |      |    |
| miR-181a  | r | .040          | -.335  | .163  | .269  | .331*   | -.214  | -.144 | .107 | .003    | .115  | -.105 | .369*  | .067             | -.185 | .125  | .286 | .102    | .313  | -.228  | .112 | .332    | .123 | .168  | .082 |     |      |      |    |
|           | p | .820          | .053   | .358  | .124  | .049    | .211   | .401  | .536 | .986    | .505  | .541  | .027   | .791             | .463  | .622  | .250 | .687    | .206  | .363   | .660 | .166    | .616 | .491  | .737 |     |      |      |    |
| miR-222   | r | .115          | -.418* | .220  | .259  | .277    | -.207  | -.079 | .012 | .159    | .007  | -.267 | .340*  | .022             | .064  | -.017 | .368 | .152    | .389  | -.222  | .078 | .292    | .098 | .168  | .183 |     |      |      |    |
|           | p | .516          | .014   | .211  | .139  | .107    | .234   | .651  | .947 | .354    | .966  | .115  | .042   | .933             | .808  | .948  | .147 | .548    | .111  | .376   | .757 | .240    | .699 | .505  | .468 |     |      |      |    |
| miR-103   | r | .012          | -.340* | .248  | .161  | .348*   | -.331* | .029  | .136 | .111    | -.030 | -.125 | .406*  | .191             | -.271 | .053  | .195 | .166    | .486* | -.267  | .032 | .368    | .166 | .200  | .039 |     |      |      |    |
|           | p | .945          | .049   | .158  | .364  | .037    | .048   | .866  | .430 | .520    | .860  | .466  | .014   | .448             | .276  | .836  | .438 | .510    | .041  | .284   | .900 | .133    | .510 | .425  | .877 |     |      |      |    |
| miR-30a   | r | .061          | -.315  | .162  | .220  | .316    | -.197  | -.082 | .190 | .034    | .129  | -.092 | .448** | .199             | -.100 | -.224 | .416 | .034    | .195  | -.309  | .118 | .404    | .247 | .119  | .033 |     |      |      |    |
|           | p | .735          | .074   | .366  | .219  | .064    | .258   | .640  | .275 | .843    | .454  | .592  | .006   | .428             | .693  | .372  | .086 | .893    | .438  | .213   | .642 | .087    | .307 | .627  | .892 |     |      |      |    |
| miR-27a   | r | .003          | -.252  | .141  | .265  | -.011   | .172   | -.098 | .296 | .094    | .128  | .038  | .272   | .001             | .094  | -.181 | .422 | .065    | .356  | -.519* | .249 | .376    | .336 | -.086 | .001 |     |      |      |    |
|           | p | .986          | .151   | .427  | .131  | .950    | .316   | .568  | .080 | .584    | .455  | .827  | .108   | .997             | .711  | .473  | .081 | .798    | .147  | .027   | .319 | .112    | .159 | .726  | .997 |     |      |      |    |
| miR-27b   | r | .144          | -.339* | .114  | .264  | .114    | .036   | -.122 | .054 | .033    | .135  | -.083 | .188   | .053             | .121  | -.156 | .356 | .011    | .350  | -.389  | .125 | .277    | .267 | -.169 | .064 |     |      |      |    |
|           | p | .416          | .050   | .520  | .132  | .506    | .834   | .479  | .756 | .851    | .440  | .634  | .281   | .836             | .633  | .537  | .147 | .964    | .155  | .111   | .621 | .282    | .300 | .516  | .808 |     |      |      |    |
| miR-200b  | r | .040          | -.401* | .268  | .232  | .171    | -.142  | -.123 | .075 | .149    | .020  | -.290 | .383*  | .057             | -.150 | .160  | .368 | .380    | .512* | .039   | .075 | .453    | .123 | .323  | .163 |     |      |      |    |
|           | p | .824          | .019   | .125  | .188  | .350    | .438   | .503  | .684 | .401    | .909  | .096  | .025   | .823             | .553  | .526  | .132 | .133    | .036  | .881   | .775 | .052    | .616 | .178  | .505 |     |      |      |    |
| miR-let7a | r | .115          | -.247  | -.008 | .428* | .503**  | -.352  | -.294 | .006 | .101    | .245  | -.033 | .178   | .125             | -.091 | -.027 | .449 | .025    | .164  | -.517* | .130 | .321    | .067 | .183  | .079 |     |      |      |    |
|           | p | .518          | .158   | .965  | .012  | .004    | .052   | .109  | .974 | .575    | .169  | .856  | .320   | .633             | .729  | .918  | .071 | .926    | .529  | .034   | .619 | .194    | .791 | .468  | .754 |     |      |      |    |
| miR-17    | r | .102          | -.373* | .135  | .231  | .434*   | -.284  | -.183 | .185 | .041    | .170  | -.090 | .445** | .117             | -.148 | -.069 | .385 | .036    | .162  | -.321  | .123 | .342    | .098 | .193  | .018 |     |      |      |    |
|           | p | .565          | .030   | .448  | .189  | .010    | .104   | .299  | .295 | .813    | .323  | .602  | .006   | .645             | .559  | .785  | .115 | .887    | .521  | .194   | .627 | .152    | .689 | .429  | .943 |     |      |      |    |

|           |   |       |        |      |      |        |       |       |      |      |      |       |        |      |       |      |       |      |      |        |      |       |       |      |       |
|-----------|---|-------|--------|------|------|--------|-------|-------|------|------|------|-------|--------|------|-------|------|-------|------|------|--------|------|-------|-------|------|-------|
| miR-let7b | r | .105  | -.342* | .129 | .270 | .450** | -.304 | -.168 | .161 | .006 | .142 | -.137 | .425** | .044 | -.187 | .123 | -.383 | .024 | .199 | -.360  | .185 | -.260 | -.004 | .256 | -.040 |
|           | p | .554  | .047   | .467 | .122 | .006   | .072  | .328  | .349 | .971 | .408 | .427  | .010   | .861 | .458  | .627 | .117  | .926 | .428 | .142   | .463 | .283  | .989  | .290 | .870  |
| miR-let7c | r | .150  | -.274  | .058 | .197 | .414*  | -.295 | -.160 | .136 | .143 | .058 | -.302 | .465** | .020 | -.102 | .092 | -.321 | .238 | .150 | .602** | .151 | -.211 | -.051 | .256 | -.026 |
|           | p | .403  | .122   | .748 | .272 | .012   | .081  | .351  | .430 | .405 | .736 | .074  | .004   | .938 | .687  | .717 | .194  | .341 | .553 | .008   | .550 | .387  | .836  | .290 | .915  |
| miR-146b  | r | -.075 | -.207  | .202 | .196 | .275   | -.094 | -.176 | .033 | .090 | .083 | -.142 | .450** | .143 | -.234 | .009 | -.453 | .203 | .387 | -.162  | .001 | -.246 | .009  | .212 | .012  |
|           | p | .683  | .256   | .268 | .282 | .134   | .614  | .344  | .862 | .612 | .641 | .423  | .008   | .570 | .349  | .971 | .059  | .434 | .125 | .535   | .996 | .311  | .972  | .383 | .960  |

Whole population was segregated at sampling time in normal-weight mothers (BMI<25) and overweight/obese (BMI≥25). Associations between miRNA expression and breast milk lipid composition were tested by Spearman's correlation test at three months. Spearman's rank correlation coefficient (r) and significance (p) is shown.

\*\* = p< 0.01 (bilateral); \* = p< 0.05 (bilateral)
